# Supplementary material for: Use of Coronary CT Angiography to Predict Obstructive Lesions in Patients with Chest Pain without Enzyme and ST-Segment Elevation
Source: MDPI journal article supplement (doi:10.3390/jcm10225442), 2021-11-21
Supplement: s1 [file s1]

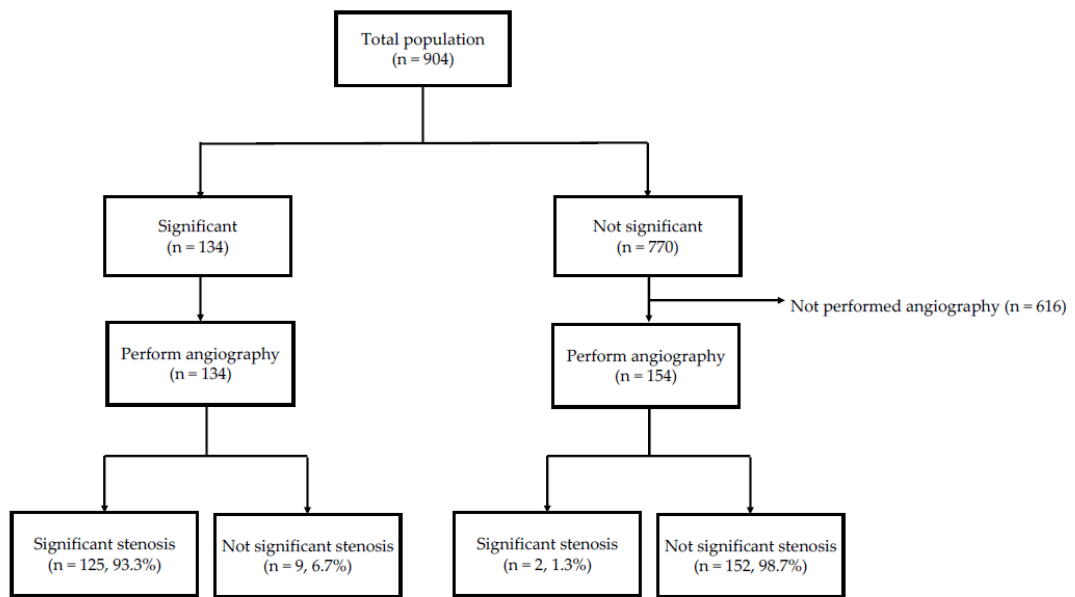

**Figure S1.** The result of coronary angiography according to presence of significant stenosis on CCTA.
